# Supplementary material for: Single molecule, near full-length genome sequencing of dengue virus
Source: PubMed Central journal article supplement (PMC7584602; doi:10.1038/s41598-020-75374-1), 2020-10-23
Supplement: 41598_2020_75374_MOESM1_ESM.pdf [file 41598_2020_75374_MOESM1_ESM.pdf]

## Supplementary material

### Single molecule, whole genome sequencing of dengue virus

Thiruni N. Adikari, Nasir Riaz, Chathurani Sigera, Preston Leung, Braulio M Valencia, Kirston Barton, Martin A. Smith, Rowena A. Bull, Hui Li, Fabio Luciani, Praveen Weeratunga, Tun-Linn Thein, Vanessa W.X. Lim, Yee-Sin Leo, Senaka Rajapakse, Katja Fink, Andrew R. Lloyd, Deepika Fernando, Chaturaka Rodrigo

#### Supplementary methods

##### RNA extraction, reverse transcription and PCR amplification

###### RNA extraction

RNA extraction was done with the QIAamp viral mini RNA kit (catalogue no. 52906) according to manufacturers instructions with the following modifications; a) 280µl of plasma/serum was used instead of 140µl and the volumes of reagents up to the washing steps was doubled, b) During the preparation of lysis buffer, instead of the carrier RNA provided by the manufacturer, 2µl of yeast RNA (Ambion, AM7118) was used per 280µl of sample, c) mixing was done gently and vortexing was avoided altogether, d) the final elution volume was kept at 40-50µl and elution was completed with RNA storage solution (Ambion, AM7000) instead of the elution buffer provided by the manufacturer.

###### *Primers*

| Region              | Round | Sense | Serotype     | Primer name | Sequence (5'-3')     |
|---------------------|-------|-------|--------------|-------------|----------------------|
| 3'UTR               | RT    | -     | DENV-1,2,3   | D1R1        | CATTTTCTGGCGTTCTGTGC |
|                     |       | -     | DENV-4       | D4R1        | TGGTCTTTCCAGCGTCAAT  |
| 5'UTR-3'-UTR        | Outer | +     | DENV-1,2,3,4 | d1s1C       | AGTTGTTAGTCTRYGTGGAC |
|                     |       | -     | DENV-1,2,3   | D1R1        | CATTTTCTGGCGTTCTGTGC |
|                     |       | -     | DENV-4       | D4R1        | TGGTCTTTCCAGCGTCAAT  |
| 5'UTR/Capsid-3'-UTR | Inner | +     | DENV-1       | D1F2        | GTTTCGAATCGGAAGCTTGC |
|                     |       | +     | DENV-2,4     | D2F2        | CTGAAACGCGAGAGAAACCG |
|                     |       | +     | DENV-2*      | D2F2_2      | AGAGAAACCGCGTGTCTACT |
|                     |       | +     | DENV-3       | D3F2        | TGGATCACAGTTGGCGAAGA |
|                     |       | -     | DENV-1,2,3   | D1R2        | TCTGTGCCTGGAATGATGCT |
|                     |       | -     | DENV-4       | D4R2        | GGGTCTCTCTAACCGCTAG  |

*\*an alternative if D2F2 does not work*

### Reverse transcription (RT)

RT is performed with Superscript III First –Strand Synthesis System for RT-PCR. Invitrogen, Cat no. 18080-051.

RT reaction mix

| Reagent                    | Quantity/20 $\mu$ l rxn.( $\mu$ l) | Final Concentration |
|----------------------------|------------------------------------|---------------------|
| 10x RT Buffer              | 2                                  | 1x                  |
| MgCl <sub>2</sub> (120 mM) | 1                                  | 6 mM                |
| Betaine (5 M)              | 4                                  | 1 M                 |
| DTT (100 mM)               | 2                                  | 10 mM               |
| RNaseOUT                   | 1                                  | -                   |
| Superscript III RT         | 1                                  | 9U                  |

- 1) Make up enough RT reaction mix for the number of reactions plus one. Make up reaction mix on ice. Do not add template.
- 2) Pipette 1  $\mu$ l of Primer (see above, 10  $\mu$ M) and 1  $\mu$ l of dNTPs (10 mM) into each 200  $\mu$ l PCR tube.
- 3) Add 7  $\mu$ l of extracted RNA to the tubes containing primer and dNTPs. (Do not add in pre-PCR room) and incubate at 65°C for 5 mins and then place on ice for 1 min.
- 4) Add 11  $\mu$ l of RT reaction mix to RNA/primer mix on ice and cycle as below.

RT cycling conditions: 49°C for 65 min, 85°C for 5 min, add 1  $\mu$ l of RNase H and incubate for 37°C for 20 mins. Hold at 12°C, Proceed to PCR immediately.

### Polymerase Chain Reaction

PCR performed with Takara LA Taq. (clontech cat no. RR002M).

- 1) Make up enough PCR reaction mix for the number of reactions plus one. Do not add template.
- 2) Add 45 $\mu$ l of PCR reaction mix to each PCR tube.
- 3) Add 5 $\mu$ l of template RNA to each tube (ie. DNA from above)

## PCR reaction mix

| Reagent                           | Quantity/50 $\mu$ l rxn. ( $\mu$ l) | Final Concentration |
|-----------------------------------|-------------------------------------|---------------------|
| 10x Buffer with Mg                | 5                                   | 1 x                 |
| dNTP (2.5mM)                      | 8                                   | 0.4mM               |
| Primer F (10 pmol/ $\mu$ l)       | 1                                   | 0.2 pmol/ $\mu$ l   |
| Primer R (10 pmol/ $\mu$ l)       | 1                                   | 0.2 pmol/ $\mu$ l   |
| dW                                | 29.5                                | -                   |
| Taq enzyme mix (5 units/ $\mu$ l) | 0.5                                 | 1 x                 |
| cDNA                              | 5                                   | -                   |

### PCR cycling conditions:

94°C for 1 min

PCR step, 10 cycles at:

Denaturation at 94°C, 30 secs

Annealing at 55°C for 20 secs

Extension at 68°C for 10 min

PCR step, 20-25 cycles at:

Denaturation at 94°C, 30 secs

Annealing at 57°C for 20 secs

Extension at 68°C for 10 min (+20 sec/cycle)

Final extension 68°C for 5 min then hold at 4°C.

### Nested Polymerase Chain Reaction

- 1) Make up enough PCR reaction mix for the number of reactions plus one. Do not add template.
- 2) Add 45 $\mu$ l of PCR reaction mix to each PCR tube.
- 3) Add 5 $\mu$ l of template DNA to each tube (ie. from the step above)

## Nested PCR reaction mix

| Reagent                       | Quantity/50 µl rxn. (µl) | Final Concentration |
|-------------------------------|--------------------------|---------------------|
| 10x Buffer with Mg            | 5                        | 1 x                 |
| dNTP (2.5mM)                  | 8                        | 0.4mM               |
| Primer F (10 pmol/µl)         | 1                        | 0.2 pmol/µl         |
| Primer R (10 pmol/µl)         | 1                        | 0.2 pmol/µl         |
| dW                            | 29.5                     | -                   |
| Taq enzyme mix (5 units/µl)   | 0.5                      | 1 x                 |
| 1 <sup>st</sup> round product | 5                        | -                   |

### PCR Cycling conditions:

94°C for 1 min

PCR step, 10 cycles at:

Denaturation at 94°C, 30 secs

Annealing at 58°C for 20 secs

Extension at 68°C for 9 min

PCR step, 20-25 cycles at:

Denaturation at 94°C, 30 secs

Annealing at 60°C for 20 secs

Extension at 68°C for 9 min (+20 sec/cycle)

Final extension 68°C for 5 min then hold at 4°C.

Separate PCR products on a 0.8% agarose gel, stain with GelRed and visualise under UV light. Size select the 10kb band with gel extraction and purify with Agencourt Ampure XP magnetic beads (Beckman Coulter, A63881) prior to submitting for sequencing.

### Nano-q tool for within host variant identification

Nano-q is currently executable on Linux systems, on command prompt. It uses contains nine user defined parameters and three optional parameters. This tool and its instructions for use are publicly available at: <https://github.com/PrestonLeung/Nano-Q>

Nano-q tool was executed for dengue samples with the following command

```
python nano-q.py -b ../<example.sorted.bam> -l 10000 -nr 1 -q 5 -j 50 -c 1 -ht 400 -mc 20
```

-l: length cut-off per read.

-nr: number of references for the alignment (usually one)

-q: threshold for base quality score for cleaning reads.

-c: starting codon (in the reference) for eligible reads.

-ht: Hamming distance cut-off where all reads within this value will fall into a single cluster.

-mc: minimum acceptable number of reads per cluster.

The values for each of these parameters were set after performing a sensitivity analysis on an in-silico data set of Hepatitis C virus plasmids (both between and within host) mixed in known proportions. These experiments, development and calibration of Nano-q tool will be published elsewhere.

### **Safeguards against detecting false variants**

There are five safeguards in Nano-q tool to avoid detection of false minor variants

1. setting the -q parameter high. This will ensure the detected single nucleotide polymorphisms are of higher quality and hence reliable.
2. increasing the -mc parameter. When similar reads are arranged to clusters to generate a mini consensus, each cluster will have more reads for better reliability
3. decreasing -ht parameter. This will ensure that very similar reads are included in a cluster and together with a high -mc parameter, will further increase the reliability of a true cluster
4. decreasing -l parameter. If non-size selected amplicons are sequenced, reducing -l may ensure more reads are available for the analysis (more information to make a reliable estimate)
5. using optional -d parameter. The code has the option to plot a dendrogram (parameter -d) which shows the user how the hierarchical clustering is currently cutting the clusters. This feature provides support to determine what to set for parameter -ht.

For all above parameters, a default number is encoded into the algorithm, based on sensitivity analysis performed using in silico HCV sequence mixes, to act as a starting point. Being more conservative in setting these parameters will increase the reliability of major variants but may also lose true minor variants. A sensitivity analysis is highly recommended by varying each of the parameters when a new dataset is used with the tool.

### **Supplementary Figure 1**

Maximum likelihood phylogenetic trees of DENV2 nanopore consensus sequences made from each of the subgenomic segments compared against that of the near full-length genome.

Caption: Capsid-PrM, envelope and NS5 region trees identify only one of the two true clusters while NS3 region identifies none. NS1, NS4 trees identify both true clusters but another additional cluster. NS 2 region identifies only the two true clusters but cannot resolve relationships within the larger cluster as can be done with the near full-length genome tree.

## Supplementary tables

**Table S1. Cq values and estimated viral loads of all the samples included in the study**

| Sample | Serotype | Cq    | PFU/mL        | Full genome amplification |
|--------|----------|-------|---------------|---------------------------|
| S1     | DENV2    | 37.62 | Not available |                           |
| S2     | DENV2    | 28.76 | Not available |                           |
| S3     | DENV2    | 16.46 | Not available | Successful                |
| S4     | DENV2    | 19.97 | Not available | Successful                |
| S5     | DENV2    | 16.5  | Not available | Successful                |
| S6     | DENV2    | 29.92 | Not available | Successful                |
| S7     | DENV2    | 30.42 | Not available |                           |
| S8     | DENV2    | 22.23 | Not available | Successful                |
| S9     | DENV4    | 38.36 | Not available |                           |
| S10    | DENV2    | 20.69 | Not available | Successful                |
| S12    | DENV2    | 13.45 | Not available | Successful                |
| S13    | DENV2    | 15.49 | Not available | Successful                |
| S14    | DENV2    | 33.89 | Not available |                           |
| S15    | DENV2    | 23.4  | Not available | Successful                |
| S16    | DENV4    | 36.67 | Not available |                           |
| S17    | DENV2    | 19.24 | Not available | Successful                |
| S18    | DENV2    | 29.51 | Not available | Successful                |
| S19    | DENV2    | 22.81 | Not available | Successful                |
| S20    | DENV2    | 37.81 | Not available |                           |
| S21    | DENV2    | 19.93 | Not available |                           |
| S22    | DENV2    | 20.59 | Not available | Successful                |
| S23    | DENV2    | 33.26 | Not available |                           |
| S24    | DENV2    | 22.91 | Not available | Successful                |
| S25    | DENV2    | 26.28 | Not available | Successful                |
| S26    | DENV4    | 40.52 | Not available |                           |
| S28    | DENV2    | 24.21 | Not available | Successful                |
| S29    | DENV4    | 39.86 | Not available |                           |
| S30    | DENV2    | 19.17 | Not available | Successful                |
| S31    | DENV2    | 36.43 | Not available |                           |
| S32    | DENV2    | 25.85 | Not available | Successful                |
| S33    | DENV4    | 38.42 | Not available |                           |
| S37    | DENV2    | 25.5  | Not available | Successful                |
| S38    | DENV2    | 24.46 | Not available | Successful                |
| S39    | DENV2    | 25.06 | Not available |                           |
| S41    | DENV2    | 30.11 | Not available |                           |
| S42    | DENV2    | 22.74 | Not available |                           |
| S45    | DENV2    | 21.75 | Not available | Successful                |

|      |       |       |               |            |
|------|-------|-------|---------------|------------|
| S46  | DENV2 | 32.86 | Not available |            |
| S47  | DENV2 | 26.98 | Not available |            |
| S48  | DENV2 | 36.97 | Not available |            |
| S50  | DENV3 | 39.51 | Not available |            |
| S53  | DENV3 | 26.41 | Not available | Successful |
| S54  | DENV2 | 32.4  | Not available | Successful |
| S56  | DENV2 | 26.71 | Not available | Successful |
| S65  | DENV2 | 39    | Not available |            |
| S68  | DENV2 | 30.33 | Not available |            |
| S69  | DENV2 | 25.15 | Not available | Successful |
| S71  | DENV2 | 24.6  | Not available |            |
| S72  | DENV2 | 26.19 | Not available | Successful |
| S73  | DENV2 | 20.94 | Not available | Successful |
| S75  | DENV1 | 27.27 | Not available | Successful |
| S76  | DENV1 | 35.43 | Not available | Successful |
| S80  | DENV2 | 30.98 | Not available |            |
| S81  | DENV2 | 21.76 | Not available | Successful |
| S82  | DENV2 | 34.71 | Not available |            |
| S83  | DENV2 | 40.05 | Not available |            |
| S86  | DENV2 | 23.56 | Not available | Successful |
| S91  | DENV2 | 26.8  | Not available |            |
| S93  | DENV2 | 22.68 | Not available |            |
| S94  | DENV2 | 25.32 | Not available | Successful |
| S96  | DENV2 | 27.8  | Not available |            |
| S97  | DENV2 | 32.37 | Not available |            |
| S99  | DENV2 | 38.27 | Not available |            |
| S100 | DENV2 | 32.37 | Not available |            |
| S101 | DENV2 | 38.42 | Not available |            |
| S102 | DENV2 | 35.46 | Not available |            |
| S103 | DENV2 | 26.09 | Not available | Successful |
| S106 | DENV2 | 25.07 | Not available | Successful |
| S107 | DENV2 | 36.39 | Not available |            |
| S108 | DENV2 | 35.15 | Not available |            |
| S109 | DENV2 | 36    | Not available |            |
| S111 | DENV2 | 21.9  | Not available | Successful |
| S113 | DENV2 | 24.26 | Not available | Successful |
| S115 | DENV2 | 28.98 | Not available |            |
| S117 | DENV2 | 35.03 | Not available |            |
| S118 | DENV2 | 39.12 | Not available |            |
| S124 | DENV1 | 38.56 | Not available | Successful |
| S125 | DENV2 | 35.46 | Not available | Successful |
| S128 | DENV1 | 29.71 | Not available |            |
| S130 | DENV2 | 24.7  | Not available | Successful |
| S244 | DENV2 | 20.09 | 19,876        |            |



|      |       |       |           |            |
|------|-------|-------|-----------|------------|
| S245 | DENV2 | 27.19 | 1400      |            |
| S252 | DENV2 | 18.61 | 55,864    | Successful |
| S255 | DENV2 | 18.57 | 57,506    |            |
| S263 | DENV2 | 19.91 | 57,506    | Successful |
| S264 | DENV2 | 20.21 | 18,372    | Successful |
| S153 | DENV1 | 32.29 | 175       | Successful |
| S169 | DENV3 | 24.48 | 215,005   | Successful |
| S173 | DENV1 | 27.22 | 6,825     | Successful |
| S188 | DENV1 | 27.97 | 3,952     | Successful |
| S199 | DENV3 | 27.58 | 3,531     | Successful |
| S205 | DENV1 | 25.79 | 2,035     |            |
| S228 | DENV1 | 25.66 | 2,243     |            |
| S256 | DENV1 | 20.09 | 2,243     |            |
| S263 | DENV1 | 19.91 | 22,501    |            |
| S264 | DENV1 | 20.21 | 18,372    |            |
| S279 | DENV1 | 28.58 | 251       | Successful |
| S303 | DENV3 | 32.93 | 68        |            |
| S311 | DENV1 | 27.73 | 476       |            |
| S312 | DENV1 | 29.31 | 146       |            |
| S316 | DENV1 | 32.61 | 12        |            |
| S331 | DENV1 | 28.65 | 238       |            |
| S350 | DENV1 | 25.68 | 309,098   | Successful |
| S355 | DENV1 | 25.68 | 261,627   | Successful |
| S378 | DENV3 | 31.51 | 7,333     |            |
| S379 | DENV1 | 33.51 | 3,705     |            |
| S383 | DENV3 | 23.11 | 1,860,288 | Successful |

**Table S2. Viral loads (as plaque forming units per ml) corresponding to Cq ranges shown in figure 1\***

| Cq value range | Number of samples* | Mean (PFU/ml)** | 95% Confidence limits                    |
|----------------|--------------------|-----------------|------------------------------------------|
| 10 - 20        | 6                  | 8,165,824       | $2.71 \times 10^3 - 2.45 \times 10^{10}$ |
| 20.01 - 25     | 46                 | 1,119,438       | $1.34 \times 10^4 - 9.35 \times 10^7$    |
| 25.01 - 30     | 112                | 63,387          | $6.08 \times 10^2 - 6.61 \times 10^6$    |
| 30.01 - 40     | 135                | 2,780           | $2.4 \times 10^1 - 3.19 \times 10^5$     |

\*This data is derived from 299 dengue samples tested with the same protocol, in the same machine by same operators. This includes samples where full-length genome was successfully extracted or failed for work described in this paper and other samples currently awaiting full-genome extraction. Please see next table for viral load for each sample described in this paper.

\*\*Mean was calculated after log transformation and reconverted (inverse log) to give value in PFU/ml. The standard deviation (SD) and confidence limits (2 SD) was calculated as log numbers and upper and lower limits of the log distribution were reconverted as PFU/ml.

**Table S3. Percentage pairwise identity of 33 consensus sequences generated by both nanopore and Illumina platforms (average genome length – 10.1 kb)**

| Sample No | Serotype | % identity between Illumina and nanopore sequencing |
|-----------|----------|-----------------------------------------------------|
| S3        | DENV2    | 99.295                                              |
| S5        | DENV2    | 99.506                                              |
| S8        | DENV2    | 99.048                                              |
| S12       | DENV2    | 99.61                                               |
| S13       | DENV2    | 99.951                                              |
| S15       | DENV2    | 99.941                                              |
| S17       | DENV2    | 99.921                                              |
| S18       | DENV2    | 99.97                                               |
| S19       | DENV2    | 99.576                                              |
| S22       | DENV2    | 99.516                                              |
| S24       | DENV2    | 99.916                                              |
| S25       | DENV2    | 99.709                                              |
| S28       | DENV2    | 99.319                                              |
| S30       | DENV2    | 99.111                                              |
| S32       | DENV2    | 99.951                                              |
| S37       | DENV2    | 99.931                                              |
| S45       | DENV2    | 99.882                                              |
| S54       | DENV2    | 99.97                                               |
| S56       | DENV2    | 99.951                                              |
| S69       | DENV2    | 99.941                                              |
| S73       | DENV2    | 99.911                                              |
| S75       | DENV1    | 99.862                                              |
| S86       | DENV2    | 99.789                                              |
| S94       | DENV2    | 99.941                                              |
| S111      | DENV2    | 99.299                                              |
| S252      | DENV2    | 99.679                                              |
| S264      | DENV2    | 99.936                                              |

|         |       |            |
|---------|-------|------------|
| S153    | DENV1 | 99.941     |
| S173    | DENV1 | 99.931     |
| S188    | DENV1 | 99.902     |
| S199    | DENV3 | 98.55      |
| S279    | DENV1 | 99.897     |
| S169    | DENV3 | 99.671     |
| Average |       | 99.7067879 |

**ST 4 – 7.** Genbank accession numbers of public database sequences used to design primers for the full-length dengue genome amplification assay

**Table S4. DENV1 reference sequences for primer design**

| Accession number | Country of origin | Year of isolation |
|------------------|-------------------|-------------------|
| JQ048541         | China             | 2011              |
| KJ806961         | Singapore         | 2014              |
| KX452067         | Malaysia          | 2014              |
| MF033257         | Singapore         | 2016              |
| MF033244         | Singapore         | 2016              |
| KC762647         | Indonesia         | 2010              |
| KU666942         | Malaysia          | 2014              |
| MF033230         | Singapore         | 2015              |
| KY057369         | Indonesia         | 2012              |
| KU509263         | Thailand          | 2012              |
| KX255489         | China             | 2015              |
| MF033254         | China             | 2016              |
| KT827369         | China             | 2011              |
| KJ755855         | India             | 2013              |
| KP398852o        | Sri Lanka         | 2014              |
| KY672932         | China             | 2015              |
| KT827371         | China             | 2011              |
| KJ649286         | Saudi Arabia      | 2011              |
| KU094071         | China             | 2015              |
| JQ915080         | New Caledonia     | 2010              |
| KX380797         | Singapore         | 2012              |
| LC128301         | Philippines       | 2016              |
| KY057366         | Indonesia         | 2012              |
| JN544411         | Singapore         | 2011              |
| MG877557         | Gabon             | 2012              |
| KC692514         | Argentina         | 2010              |
| KJ189366         | Puerto Rico       | 2010              |
| KU509252         | Venezuela         | 2010              |
| MH450312         | Venezuela         | 2015              |
| JQ675358         | USA               | 2010              |
| KJ189369         | Mexico            | 2011              |
| KF973458         | Nicaragua         | 2012              |
| KY829115         | St. Barthelemy    | 2016              |
| KP188543         | Brazil            | 2012              |
| KX618705         | India             | 2014              |
| KU509255         | India             | 2011              |
| MF033255         | Singapore         | 2016              |
| KY921903         | Singapore         | 2015              |

**Table S5. DENV2 reference sequences for primer design**

| Accession number | Country of origin | Year of isolation |
|------------------|-------------------|-------------------|
| JX286518         | Brazil            | 2010              |
| KC294223         | Peru              | 2010              |
| KU509267         | Guatemala         | 2010              |
| KY474312         | Ecuador           | 2014              |
| MH215277         | Venezuela         | 2016              |
| KU094070         | China             | 2015              |
| KY672955         | China             | 2015              |
| LC410185         | Thailand          | 2016              |
| KX274130         | Australia         | 2015              |
| KJ010185         | Pakistan          | 2011              |
| JQ955624         | India             | 2011              |
| MH822945         | India             | 2012              |
| KY937188         | China             | 2015              |
| KY672953         | China             | 2015              |
| MH822940         | India             | 2014              |
| MK578533         | China             | 2018              |
| KY427084         | India             | 2010              |
| MG560143         | India             | 2014              |
| KY627763         | Burkina Faso      | 2016              |
| KU509274         | Philippines       | 2010              |
| KC131142         | China             | 2012              |
| MG779203         | Kenya             | 2017              |
| MF314189         | Singapore         | 2016              |
| KX452025         | Malaysia          | 2014              |
| MH010629         | China             | 2017              |
| MH823208         | Indonesia         | 2014              |
| KY921904         | Singapore         | 2014              |
| MK564486         | China             | 2018              |
| KX225485         | China             | 2015              |
| KC762678         | Indonesia         | 2010              |
| KX380813         | Singapore         | 2012              |

**Table S6. DENV3 reference sequences for primer design**

| Accession number | Country of origin | Year of isolation |
|------------------|-------------------|-------------------|
| JF295012         | Cambodia          | 2007              |
| EU482457         | Vietnam           | 2006              |
| KU509284         | Thailand          | 2008              |
| KJ622195         | China             | 2013              |
| MG721059         | India             | 2016              |
| JN662391         | China             | 2009              |
| FJ898441         | Mexico            | 2006              |
| FJ182041         | USA               | 2005              |
| FJ639817         | Venezuela         | 2006              |
| GQ868578         | Colombia          | 2007              |
| JF808121         | Brazil            | 2007              |
| MH888333         | Bolivia           | 2011              |
| FJ850089         | Brazil            | 2006              |
| FJ898474         | Venezuela         | 2007              |
| KJ189287         | Peru              | 2008              |
| EU854292         | Venezuela         | 2005              |
| KF973484         | Nicaragua         | 2011              |
| JN697379         | Brazil            | 2006              |
| KU509279         | Philippines       | 2008              |
| MF004386         | Malaysia          | 2012              |
| KY863456         | Indonesia         | 2016              |
| KY794786         | Papua New Guinea  | 2010              |
| GU370052         | Singapore         | 2009              |

**Table S7. DENV4 reference sequences for primer design**

| Accession number | Country of origin | Year of isolation |
|------------------|-------------------|-------------------|
| GQ398256         | Singapore         | 2005              |
| MK614089         | China             | 2018              |
| MH823210         | Indonesia         | 2014              |
| JX024758         | Singapore         | 2010              |
| LC069810         | Japan             | 2015              |
| JF741967         | China             | 2010              |
| KC762694         | Indonesia         | 2007              |
| KU509288         | Indonesia         | 2010              |
| KY921910         | Singapore         | 2016              |
| KC762695         | Indonesia         | 2007              |
| JQ915086         | New Caledonia     | 2009              |
| LC410197         | Thailand          | 2016              |
| KX224312         | Singapore         | 2014              |
| JN638572         | Cambodia          | 2008              |
| JQ513345         | Brazil            | 2011              |
| KP792537         | Singapore         | 2011              |
| MG272273         | India             | 2016              |
| KF041260         | Pakistan          | 2009              |
| KM190936         | Thailand          | 2006              |
| JQ513334         | Brazil            | 2010              |
| KY474335         | Ecuador           | 2014              |
| FJ882586         | Venezuela         | 2007              |
| JQ513331         | Brazil            | 2010              |
| JQ513342         | Brazil            | 2011              |
| KJ596666         | Brazil            | 2012              |
| MK514144         | Haiti             | 2015              |

**Supplementary data (Please see attached folder)**

Datafile 1. Consensus full genome sequences of all 51 DENV sequences from this study (also deposited in Genbank – accession numbers MT006136 – MT006186)

Datafile 2. Alignment of 14 DENV2 sequences with a coverage > 100, sequenced with nanopore technology

Datafile 3. Same subjects as in datafile 2, sequenced with Illumina technology (sequences denoted with a “\_I”)

Datafile 4. Alignment of within host variants of DENV2. (Subject name is followed by frequency of the variant. Only unique variants are shown)

Datafile 5. Alignment of within host variants of DENV1 (Subject name is followed by frequency of the variant. Only unique variants are shown)
